# Supplementary material for: 3D video tracking analysis reveals that mosquitoes pass more successfully through holes of a permethrin-treated than an untreated net
Source: Research Square preprint supplement (doi:10.21203/rs.3.rs-3006212/v1), 2023-06-14
Supplement: Supplementary file 1 [file 6a4e606dc36608515be6827c.docx]

**Supplementary Video S1: Extracts of tunnel assays with each strain and net type.** This video shows examples of susceptible and permethrin-resistant mosquitoes participating in tunnel experiments and interacting with an untreated or a permethrin-treated net. Out of the 10 min experiments, representative 30 s clips are shown and played at actual speed.
